# Supplementary material for: Osteology of Huabeisaurus allocotus (Sauropoda: Titanosauriformes) from the Upper Cretaceous of China
Source: PLoS One. 2013 Aug 2;8(8):e69375. doi: 10.1371/journal.pone.0069375 (PMC3732233; doi:10.1371/journal.pone.0069375)
Supplement: File S5 — (XLS) [file pone.0069375.s005.xls]

## Sheet: Ordered
Genus	Species	Clade		SI	Continent	Formation	Period	Epoch	Age	E/L	Reference (see ESM 5)	Specimen #
Abydosaurus	mcintoshi	Br		3.25	NA	Cedar Mountain	K	Early	Albian	Late	Chure et al., 2010	DINO16488
Abydosaurus	mcintoshi	Br		3.25	NA	Cedar Mountain	K	Early	Albian	Late	Chure et al., 2010	DINO16489
Abydosaurus	mcintoshi	Br		2.6	NA	Cedar Mountain	K	Early	Albian	Late	Chure et al., 2010	DINO16490
Abydosaurus	mcintoshi	Br		2.6	NA	Cedar Mountain	K	Early	Albian	Late	Chure et al., 2010	DINO16491
Abydosaurus	mcintoshi	Br		2.6	NA	Cedar Mountain	K	Early	Albian	Late	Chure et al., 2010	DINO16492
Abydosaurus	mcintoshi	Br		3	NA	Cedar Mountain	K	Early	Albian	Late	Chure et al., 2010	DINO16493
Abydosaurus	mcintoshi	Br		3	NA	Cedar Mountain	K	Early	Albian	Late	Chure et al., 2010	DINO16494
Abydosaurus	mcintoshi	Br		2.4	NA	Cedar Mountain	K	Early	Albian	Late	Chure et al., 2010	DINO16495
Abydosaurus	mcintoshi	Br		2.4	NA	Cedar Mountain	K	Early	Albian	Late	Chure et al., 2010	DINO16496
Brachiosauridae	indet1	Br		2.13084	AS	Jinju	K	Early	Barremian-Aptian		Lim et al., 2001	KS 7002
Brachiosauridae	indet2	Br		2.29464	AF	Sandstone an Jouar Es-Souss	K	Early	Neocomian		Buffetaut et al., 2006	JAzar1
Brachiosaurinae	indet3	Br		1.725	EU	Aras de Alpuente?	K	Early	Hauterivian-Aptian		Sanz, 1985
Brachiosaurus	sp.	Br		1.93493	NA	Morrison	J	Late	Kimmeridgian-Tithonian		Carpenter and Tidwell, 1998	USNM 5730
Brachiosaurus	brancai	Br		2.62632	AF	Tendaguru	J	Late	Kimmeridgian-Tithonian		Janensch, 1935-1936	S66
Brachiosaurus	brancai	Br		2.92571	AF	Tendaguru	J	Late	Kimmeridgian-Tithonian		Janensch, 1935-1936	S116
Brachiosaurus	brancai	Br		2.55758	AF	Tendaguru	J	Late	Kimmeridgian-Tithonian		Janensch, 1935-1936	S116
Brachiosaurus	brancai	Br		2.84375	AF	Tendaguru	J	Late	Kimmeridgian-Tithonian		Janensch, 1935-1936	S116
Brachiosaurus	brancai	Br		2.4661	AF	Tendaguru	J	Late	Kimmeridgian-Tithonian		Janensch, 1935-1936	S116
Brachiosaurus	brancai	Br		2.64641	AF	Tendaguru	J	Late	Kimmeridgian-Tithonian		Janensch, 1935-1936	S116
Brachiosaurus	brancai	Br		2.54144	AF	Tendaguru	J	Late	Kimmeridgian-Tithonian		Janensch, 1935-1936	S116
Brachiosaurus	brancai	Br		2.53731	AF	Tendaguru	J	Late	Kimmeridgian-Tithonian		Janensch, 1935-1936	S66
Brachiosaurus	brancai	Br		1.98667	AF	Tendaguru	J	Late	Kimmeridgian-Tithonian		Janensch, 1935-1936	S66
Brachiosaurus	brancai	Br		2.20915	AF	Tendaguru	J	Late	Kimmeridgian-Tithonian		Janensch, 1935-1936	S116
Brachiosaurus	brancai	Br		1.74074	AF	Tendaguru	J	Late	Kimmeridgian-Tithonian		Janensch, 1935-1936	S116
Brachiosaurus	brancai	Br		2.17557	AF	Tendaguru	J	Late	Kimmeridgian-Tithonian		Janensch, 1935-1936	S116
Brachiosaurus	brancai	Br		2	AF	Tendaguru	J	Late	Kimmeridgian-Tithonian		Janensch, 1935-1936	S116
Brachiosaurus	brancai	Br		1.72	AF	Tendaguru	J	Late	Kimmeridgian-Tithonian		Janensch, 1935-1936	S116
Europasaurus		Br		2.65714	EU		J	Late	Kimmeridgian		Laven, 2001	DFMMh/FV 422
Europasaurus		Br		2.32824	EU		J	Late	Kimmeridgian		Laven, 2001	DFMMh/FV 423
Europasaurus		Br		2.36774	EU		J	Late	Kimmeridgian		Laven, 2001	DFMMh/FV 424
Europasaurus		Br		2.51111	EU		J	Late	Kimmeridgian		Laven, 2001	DFMMh/FV 425
Europasaurus		Br		2.17143	EU		J	Late	Kimmeridgian		Laven, 2001	DFMMh/FV 426
Europasaurus		Br		2.57764	EU		J	Late	Kimmeridgian		Laven, 2001	DFMMh/FV 427
Europasaurus		Br		2.45806	EU		J	Late	Kimmeridgian		Laven, 2001	DFMMh?FV 291.33
Fr. Bothriospondylus		Br		2.64844	EU	Isalo	J	Late	Oxfordian	Late	Lapparent, 1943
Fr. Bothriospondylus		Br		2.35519	EU	Isalo	J	Late	Oxfordian	Late	Lapparent, 1943
Fr. Bothriospondylus		Br		2.11719	EU	Isalo	J	Late	Oxfordian	Late	Lapparent, 1943
Fr. Bothriospondylus		Br		2.68452	EU	Isalo	J	Late	Oxfordian	Late	Lapparent, 1943
Fr. Bothriospondylus		Br		2.64912	EU	Isalo	J	Late	Oxfordian	Late	Lapparent, 1943
			avg	2.45354
			min	1.72
			max	3.25
			sd	0.375401
Apatosaurus	sp.	Dip		4.35354	NA	Morrison	J	Late	Kimmeridgian-Tithonian		Chure et al., 2010	CMC VP 7801
Apatosaurus	sp.	Dip		4.76136	NA	Morrison	J	Late	Kimmeridgian-Tithonian		Chure et al., 2010	CMC VP 7801
Apatosaurus	sp.	Dip		4.775	NA	Morrison	J	Late	Kimmeridgian-Tithonian		Chure et al., 2010	CMC VP 7801
Apatosaurus	sp.	Dip		4.34343	NA	Morrison	J	Late	Kimmeridgian-Tithonian		Chure et al., 2010	CMC VP 7801
Demandasaurus	darwini	Dip		5.29	EU	Castrillo de la Reina	K	Early	Barremian-Aptian		Fernandez-Baldor et al. 2011	MDS-RVII,437
Demandasaurus	darwini	Dip		3.88	EU	Castrillo de la Reina	K	Early	Barremian-Aptian		Fernandez-Baldor et al. 2011	MDS-RVII,438
Demandasaurus	darwini	Dip		4.14	EU	Castrillo de la Reina	K	Early	Barremian-Aptian		Fernandez-Baldor et al. 2011	MDS-RVII,439
Dicraeosauridae	indet1	Dip		3.81	SA	La Amarga	K	Early	Barremian		Apestiguia, 2007	MACNPV N99
Dicraeosauridae	indet1	Dip		4.72973	SA	La Amarga	K	Early	Barremian		Apestiguia, 2007	MACNPV N100
Dicraeosaurus	hansemanni	Dip		4.61111	AF	Tendaguru	J	Late	Kimmeridgian-Tithonian		Janensch, 1935-1936	d429
Dicraeosaurus	hansemanni	Dip		4.87619	AF	Tendaguru	J	Late	Kimmeridgian-Tithonian		Janensch, 1935-1936	d429
Dicraeosaurus	hansemanni	Dip		4.08163	AF	Tendaguru	J	Late	Kimmeridgian-Tithonian		Janensch, 1935-1936	d429
Diplodocus	carnegii	Dip		4.89744	NA	Morrison	J	Late	Kimmeridgian-Tithonian		Holland, 1924	CM 11161
Diplodocus	carnegii	Dip		5.25641	NA	Morrison	J	Late	Kimmeridgian-Tithonian		Holland, 1924	CM 11161
Diplodocus	carnegii	Dip		5.31707	NA	Morrison	J	Late	Kimmeridgian-Tithonian		Holland, 1924	CM 11161
Limaysaurus	tessonei	Dip		5.23	SA	Rio Limay	K	Late	Albian-Cenomanian		Chure et al., 2010
Nigersaurus	taqueti	Dip		3.87	AF	Elrhaz					Chure et al., 2010	G6-1
Nigersaurus	taqueti	Dip		4.06122	AF	Elrhaz	K	Early	Aptian-Albian		Chure et al., 2010	G89
Nigersaurus	taqueti	Dip		4.11	AF	Elrhaz	K	Early	Aptian-Albian		Chure et al., 2010	G110
Nigersaurus	taqueti	Dip		4.65	AF	Elrhaz	K	Early	Aptian-Albian		Chure et al., 2010	G110
Nigersaurus	taqueti	Dip		3.53	AF	Elrhaz	K	Early	Aptian-Albian		Chure et al., 2010	G110
Nigersaurus	taqueti	Dip		3.90323	AF	Elrhaz	K	Early	Aptian-Albian		Chure et al., 2010	G89
Nigersaurus	taqueti	Dip		5.27451	AF	Elrhaz	K	Early	Aptian-Albian		Sereno et al., 1999	MNN GDF512
Nigersaurus	taqueti	Dip		3.89286	AF	Elrhaz	K	Early	Aptian-Albian		Chure et al., 2010	G100
Nigersaurus	taqueti	Dip		3.64	AF	Elrhaz	K	Early	Aptian-Albian		Chure et al., 2010	G100
Nigersaurus	taqueti	Dip		3.31034	AF	Elrhaz	K	Early	Aptian-Albian		Chure et al., 2010	G2
Rebbachisauridae	indet1	Dip		4.3913	SA	La Amarga	K	Early	Barremian		Apestiguia, 2007	MACNPV N101
Rebbachisauridae	indet2	Dip		5.73737	EU	Wessex	K	Early	Barremian		Naish and Martill 2001	IWCMS.2001.201
Rebbachisauridae	indet2	Dip		4.62963	EU	Wessex	K	Early	Barremian		Naish and Martill 2001	IWCMS.2001.202
Rebbachisauridae	indet2	Dip		4.41	EU	Wessex	K	Early	Barremian		Naish and Martill 2001	IWCMS.2001.203
			avg	4.45878
			min	3.31034
			max	5.73737
			sd	0.610756
Euhelopus	zdanskyi	Euh		2.6	AS	Meng-Yin	J	Late	Kimmeridgian-Tithonian		Mateer and McIntosh, 1985	PMU.R233a
Euhelopus	zdanskyi	Euh		3.33333	AS	Meng-Yin	J	Late	Kimmeridgian-Tithonian		Mateer and McIntosh, 1985	PMU.R233a
Euhelopus	zdanskyi	Euh		2.5	AS	Meng-Yin	J	Late	Kimmeridgian-Tithonian		Mateer and McIntosh, 1985	PMU.R233a
Euhelopus	zdanskyi	Euh		2.2	AS	Meng-Yin	J	Late	Kimmeridgian-Tithonian		Mateer and McIntosh, 1985	PMU.R233a
Euhelopus	zdanskyi	Euh		2.4	AS	Meng-Yin	J	Late	Kimmeridgian-Tithonian		Mateer and McIntosh, 1985	PMU.R233a
Euhelopus	zdanskyi	Euh		2.25	AS	Meng-Yin	J	Late	Kimmeridgian-Tithonian		Mateer and McIntosh, 1985	PMU.R233a
Euhelopus	zdanskyi	Euh		2.25	AS	Meng-Yin	J	Late	Kimmeridgian-Tithonian		Mateer and McIntosh, 1985	PMU.R233a
Huabeisaurus	allocotus	Euh		3.46	AS	Huiquanpu	K	Late			Pang and Cheng, 2000	HBV-20001
Huabeisaurus	allocotus	Euh		3.36	AS	Huiquanpu	K	Late			Pang and Cheng, 2000	HBV-20001
Phuwiangosaurus	sirindhornae	Euh		5	AS	Sao Khua	K	Early	Hauterivian-Valanginian		Buffetaut et al., 2002
Phuwiangosaurus	sirindhornae	Euh		4.9359	AS	Sao Khua	K	Early	Hauterivian-Valanginian		Buffetaut et al., 2002
Phuwiangosaurus	sirindhornae	Euh		3.9604	AS	Sao Khua	K	Early	Hauterivian-Valanginian		Chure et al., 2010	K4233
Phuwiangosaurus	sirindhornae	Euh		3.46535	AS	Sao Khua	K	Early	Hauterivian-Valanginian		Chure et al., 2010	K4233
Phuwiangosaurus	sirindhornae	Euh		3.25843	AS	Sao Khua	K	Early	Hauterivian-Valanginian		Chure et al., 2010	K4233
Phuwiangosaurus	sirindhornae	Euh		4.26531	AS	Sao Khua	K	Early	Hauterivian-Valanginian		Chure et al., 2010	K4233
Phuwiangosaurus	sirindhornae	Euh		4.5	AS	Sao Khua	K	Early	Hauterivian-Valanginian		Chure et al., 2010	K4233
Phuwiangosaurus	sirindhornae	Euh		3.2623	AS	Sao Khua	K	Early	Hauterivian-Valanginian		Chure et al., 2010	K4233
Phuwiangosaurus	sirindhornae	Euh		3.54237	AS	Sao Khua	K	Early	Hauterivian-Valanginian		Chure et al., 2010	K4233
Phuwiangosaurus	sirindhornae	Euh		4.57377	AS	Sao Khua	K	Early	Hauterivian-Valanginian		Chure et al., 2010	K4233
Phuwiangosaurus	sirindhornae	Euh		4.01667	AS	Sao Khua	K	Early	Hauterivian-Valanginian		Chure et al., 2010	K4233
Phuwiangosaurus	sirindhornae	Euh		4.85	AS	Sao Khua	K	Early	Hauterivian-Valanginian		Chure et al., 2010	K4233
Phuwiangosaurus	sirindhornae	Euh		5.27119	AS	Sao Khua	K	Early	Hauterivian-Valanginian		Chure et al., 2010	K4233
Phuwiangosaurus	sirindhornae	Euh		6.31481	AS	Sao Khua	K	Early	Hauterivian-Valanginian		Chure et al., 2010	K4233
			avg	3.72043
			min	2.2
			max	6.31481
			sd	1.11389
Alamosaurus	sanjuanensis	Ti		3.10714	NA	Kirtland Shale	K	Late	Lancian		Kues et al., 1980	FKK-034
Alamosaurus	sanjuanensis	Ti		3.15525	NA		K	Late	Maastrichtian		Sullivan and Lucas, 2000	SMP VP 1097
Ampelosaurus	atacis	Ti		2.70833	EU	Marnes Rouges Inférieures	K	Late	Maastrichtian		Le Loeuff, 1995	MDE-C3-52
Antarctosaurus	wichmannianus	Ti		4.94	SA		K	Late	Santonian-Campanian		Chure et al., 2010	MACN 6904
Karongasaurus	gittelmani	Ti		3.72881	AF	Dinosaur Beds?	K	Early	Aptian?		Gomani, 2005	MAL-36
Karongasaurus	gittelmani	Ti		4.38776	AF	Dinosaur Beds?	K	Early	Aptian?		Gomani, 2005	MAL-7
Laplatasaurus	sp.	Ti		3.10127	SA	Yacoraite	K	Late	Maastrichtian		Powell, 1979	PVL 3670-12?
Malawisaurus	dixeyi	Ti		3.46364	AF	Dinosaur Beds?	K	Early	Aptian?		Gomani, 2005	MAL-176
Malawisaurus	dixeyi	Ti		3.31579	AF	Dinosaur Beds?	K	Early	Aptian?		Gomani, 2005	MAL-192-2
Maxakalisaurus	topai	Ti		3.52083	SA	Adamantina	K	Late	Campanian-Maastrichtian		Kellner et al., 2006	MN 5013-V
Nemegtosaurus	mongoliensis	Ti		4.28571	AS	Nemegt Beds	K	Late	Campanian-Maastrichtian		Nowinski, 1971	MgD-I/9
Nemegtosaurus	mongoliensis	Ti		4.52688	AS	Nemegt Beds	K	Late	Campanian-Maastrichtian		Nowinski, 1971	MgD-I/9
Nemegtosaurus	mongoliensis	Ti		4.64211	AS	Nemegt Beds	K	Late	Campanian-Maastrichtian		Nowinski, 1971	MgD-I/9
Nemegtosaurus	mongoliensis	Ti		4.66667	AS	Nemegt Beds	K	Late	Campanian-Maastrichtian		Nowinski, 1971	MgD-I/9
Nemegtosaurus	mongoliensis	Ti		4.63441	AS	Nemegt Beds	K	Late	Campanian-Maastrichtian		Nowinski, 1971	MgD-I/9
Nemegtosaurus	mongoliensis	Ti		4.67033	AS	Nemegt Beds	K	Late	Campanian-Maastrichtian		Nowinski, 1971	MgD-I/9
Nemegtosaurus	mongoliensis	Ti		3.9604	AS	Nemegt Beds	K	Late	Campanian-Maastrichtian		Nowinski, 1971	MgD-I/9
Nemegtosaurus	mongoliensis	Ti		3.9	AS	Nemegt Beds	K	Late	Campanian-Maastrichtian		Nowinski, 1971	MgD-I/9
Nemegtosaurus	mongoliensis	Ti		3.93939	AS	Nemegt Beds	K	Late	Campanian-Maastrichtian		Nowinski, 1971	MgD-I/9
Rapetosaurus	krausei	Ti		4.06533	MA	Maevarano	K	Late	Maastrichtian		Curry Rogers and Forster, 2001	UA 8698
Tapuiasaurus	macedoi	Ti		3.4	SA	Quiricó	K	Early	Aptian		Zaher et al., 2011	MZSP-Pv 807
Tapuiasaurus	macedoi	Ti		4.1	SA	Quiricó	K	Early	Aptian		Zaher et al., 2011	MZSP-Pv 807
Tapuiasaurus	macedoi	Ti		4.9	SA	Quiricó	K	Early	Aptian		Zaher et al., 2011	MZSP-Pv 807
Tapuiasaurus	macedoi	Ti		5.9	SA	Quiricó	K	Early	Aptian		Zaher et al., 2011	MZSP-Pv 807
Titanosaurus	sp.	Ti		6.22917	SA		K	Late	Maastrichtian	Early	Huene, 1929
Titanosaurus	sp.	Ti		6.45098	SA		K	Late	Maastrichtian	Early	Huene, 1929
			avg	4.21924
			min	2.70833
			max	6.45098
			sd	0.952553
Ligabuesaurus	leanzai			1.83077	SA	Lohan Cura	K	Early	Aptian-Albian		Bonaparte et al. 2006	MCF-PVPH-233
Ligabuesaurus	leanzai			2.07925	SA	Lohan Cura	K	Early	Aptian-Albian		Martinelli et al, 2007	MCF-PVPH-744
Abrosaurus	gigantorhinus			1.95652	AS	Shaximiao	J	Middle			Zhang and Chen, 1996
Abrosaurus	gigantorhinus			1.9403	AS	Shaximiao	J	Middle			Zhang and Chen, 1996
Adeopapposaurus	mognai			1.82143	SA	Canon de Colorado	J	Early			Martinez, 2009	PVSJ610
Adeopapposaurus	mognai			1.7931	SA	Canon de Colorado	J	Early			Martinez, 2009	PVSJ610
Adeopapposaurus	mognai			1.72414	SA	Canon de Colorado	J	Early			Martinez, 2009	PVSJ610
Adeopapposaurus	mognai			1.83333	SA	Canon de Colorado	J	Early			Martinez, 2009	PVSJ610
Adeopapposaurus	mognai			1.78571	SA	Canon de Colorado	J	Early			Martinez, 2009	PVSJ610
Adeopapposaurus	mognai			1.31818	SA	Canon de Colorado	J	Early			Martinez, 2009	PVSJ610
Adeopapposaurus	mognai			1.65306	SA	Canon de Colorado	J	Early			Martinez, 2009	PVSJ568
Adeopapposaurus	mognai			1.70732	SA	Canon de Colorado	J	Early			Martinez, 2009	PVSJ568
Adeopapposaurus	mognai			1.54762	SA	Canon de Colorado	J	Early			Martinez, 2009	PVSJ568
Adeopapposaurus	mognai			1.525	SA	Canon de Colorado	J	Early			Martinez, 2009	PVSJ568
Adeopapposaurus	mognai			1.57895	SA	Canon de Colorado	J	Early			Martinez, 2009	PVSJ568
Adeopapposaurus	mognai			1.76087	SA	Canon de Colorado	J	Early			Martinez, 2009	PVSJ568
Adeopapposaurus	mognai			1.71739	SA	Canon de Colorado	J	Early			Martinez, 2009	PVSJ568
Adeopapposaurus	mognai			1.41379	SA	Canon de Colorado	J	Early			Martinez, 2009	PVSJ568
Adeopapposaurus	mognai			1.97561	SA	Canon de Colorado	J	Early			Martinez, 2009	PVSJ568
Amygdalodon	patagonicus			1.5	SA	Cerro Carnerero	J	Middle	Bajocian		Cabrera, 1947	46-VIII-21-1 15
Amygdalodon	patagonicus			1.40833	SA	Cerro Carnerero	J	Middle	Bajocian		Casamiquela, 1963	46-VIII-21-1 12
Anchisaurus	polyzelus			2.27778	NA	Portland	J	Early-Mid	Pliensbachian-Bajocian		Galton, 1976	YPM 1883
Anchisaurus	polyzelus			2	NA	Portland	J	Early-Mid	Pliensbachian-Bajocian		Galton, 1976	YPM 1883
Aragosaurus	ischiaticus			3.084	EU	Castellar	K	Early	Hauterivian		Sanz et al., 1987
Aragosaurus				2.58447	EU		K	Early			Sanz, 1982
Archaeodontosaurus	descouensi			1.364	MAD	Isalo IIIb	J	Middle	Bathonian		Buffetaut, 2005	MHNDPal 2003-397
Archaeodontosaurus	descouensi			1.48659	MAD	Isalo IIIb	J	Middle	Bathonian		Buffetaut, 2005	MHNDPal 2003-397?
Archaeodontosaurus	descouensi			1.33725	MAD	Isalo IIIb	J	Middle	Bathonian		Buffetaut, 2005	MHNDPal 2003-396
Asiatosaurus	kawangshiensis			1.64754	AS	Napan	K	Early			Hou et al., 1975
Asiatosaurus	mongoliensis			2.04787	AS	Oshih (Ashile)	K	Early			Osborn 1924	AMNH 6264
Asiatosaurus	mongoliensis			2.075	AS	Oshih (Ashile)	K	Early			Osborn 1924	AMNH 6294
Astrodon	johnstoni			2.84211	NA	Arundel	K	Early	Aptian-Albian		Leidy, 1865	YPM798
Astrodon	johnstoni			3.2	NA	Arundel	K	Early	Aptian-Albian		Carpenter and Tidwell, 2005	USNM 6105
Astrodon	johnstoni			2.25	NA	Arundel	K	Early	Aptian-Albian		Carpenter and Tidwell, 2005	USNM 8516
Astrodon	johnstoni			2	NA	Arundel	K	Early	Aptian-Albian		Lull, 1911	USNM 5691
Astrodon	johnstoni			2.22222	NA	Arundel	K	Early	Aptian-Albian		Lull, 1911	USNM 8443
Astrodon	johnstoni			2.58333	NA	Arundel	K	Early	Aptian-Albian		Lull, 1911	? (Pl. 14, Fig8)
c.f. Astrodon				2.7284	NA	Cloverly	K	Early	Aptian-Albian		Ostrom, 1970	YPM 5374
Atlasaurus	imelakei			2.07692	AF	Guettioua	J	Middle	Bathonian-Callovian		Monbaron et al., 1999
Atlasaurus	imelakei			1.64835	AF	Guettioua	J	Middle	Bathonian-Callovian		Monbaron et al., 1999
Azendohsaurus	laaroussi			1.77228	AF	Argana	T	Late	Carnian	Middle	Dutuit, 1972	MNHN MTD-XVI 2
Azendohsaurus	laaroussi			1.81132	AF	Argana	T	Late	Carnian	Middle	Dutuit, 1972	MNHN MTD-XVI 1
Azendohsaurus	laaroussi			1.89362	AF	Argana	T	Late	Carnian	Middle	Dutuit, 1972	MNHN MTD-XVI 1
Azendohsaurus	laaroussi			1.66	AF	Argana	T	Late	Carnian	Middle	Dutuit, 1972	MNHN MTD-XVI 1
Azendohsaurus	laaroussi			1.98113	AF	Argana	T	Late	Carnian	Middle	Dutuit, 1972	MNHN MTD-XVI 1
Azendohsaurus	laaroussi			2.12766	AF	Argana	T	Late	Carnian	Middle	Dutuit, 1972	MNHN MTD-XVI 1
Azendohsaurus	laaroussi			2.04545	AF	Argana	T	Late	Carnian	Middle	Dutuit, 1972	MNHN MTD-XVI 1
Azendohsaurus	laaroussi			1.95122	AF	Argana	T	Late	Carnian	Middle	Dutuit, 1972	MNHN MTD-XVI 1
Azendohsaurus	laaroussi			1.51351	AF	Argana	T	Late	Carnian	Middle	Dutuit, 1972	MNHN MTD-XVI 1
Azendohsaurus	laaroussii			1.51667	AF	Argana	T	Late	Carnian		Gauffre, 1993	MNhn-ALM 351
Azendohsaurus	laaroussii			1.29091	AF	Argana	T	Late	Carnian		Gauffre, 1993	MNhn-ALM 351
Azendohsaurus	laaroussii			1.75	AF	Argana	T	Late	Carnian		Gauffre, 1993	MNhn-ALM 351
Azendohsaurus	laaroussii			1.12963	AF	Argana	T	Late	Carnian		Gauffre, 1993	MNHN-ALM 365-20
Azendohsaurus	laaroussii			1.275	AF	Argana	T	Late	Carnian		Gauffre, 1993	MNHN-ALM 365-20
Azendohsaurus	laaroussii			1.17647	AF	Argana	T	Late	Carnian		Gauffre, 1993	MNHN-ALM 355-3
Azendohsaurus	laaroussii			1.42857	AF	Argana	T	Late	Carnian		Gauffre, 1993	MNHN-ALM 355-3
Azendohsaurus	laaroussii			1.07143	AF	Argana	T	Late	Carnian		Gauffre, 1993	MNHN-ALM 355-3
Bellusaurus	sui			1.47273	AS	Wucaiwan	J	Middle-Late			Dong, 1990	IVPP V8299
Camarasaurus	grandis			2.10909	NA	Morrison	J	Late	Kimmeridgian-Tithonian		McIntosh et al., 1996	GMNH PV 101 364
Camarasaurus	grandis			1.72727	NA	Morrison	J	Late	Kimmeridgian-Tithonian		McIntosh et al., 1996	GMNH PV 101 365
Camarasaurus	grandis			2.02542	NA	Morrison	J	Late	Kimmeridgian-Tithonian		McIntosh et al., 1996	GMNH PV 101 362
Camarasaurus	grandis			1.96212	NA	Morrison	J	Late	Kimmeridgian-Tithonian		McIntosh et al., 1996	GMNH PV 101 360
Camarasaurus	grandis			2.12295	NA	Morrison	J	Late	Kimmeridgian-Tithonian		McIntosh et al., 1996	GMNH PV 101 363
Camarasaurus	grandis			1.86047	NA	Morrison	J	Late	Kimmeridgian-Tithonian		McIntosh et al., 1996	GMNH PV 101 361
Camarasaurus	grandis			1.89474	NA	Morrison	J	Late	Kimmeridgian-Tithonian		McIntosh et al., 1996	GMNH PV 101 366
Camarasaurus	grandis			1.86726	NA	Morrison	J	Late	Kimmeridgian-Tithonian		McIntosh et al., 1996	GMNH PV 101 368
Camarasaurus	grandis			1.69421	NA	Morrison	J	Late	Kimmeridgian-Tithonian		McIntosh et al., 1996	GMNH PV 101 374
Camarasaurus	grandis			1.85185	NA	Morrison	J	Late	Kimmeridgian-Tithonian		McIntosh et al., 1996	GMNH PV 101 375
Camarasaurus	grandis			1.89313	NA	Morrison	J	Late	Kimmeridgian-Tithonian		McIntosh et al., 1996	GMNH PV 101 376
Camarasaurus	grandis			1.84034	NA	Morrison	J	Late	Kimmeridgian-Tithonian		McIntosh et al., 1996	GMNH PV 101 377
Camarasaurus	grandis			1.61972	NA	Morrison	J	Late	Kimmeridgian-Tithonian		McIntosh et al., 1996	GMNH PV 101 369
Camarasaurus	grandis			1.93151	NA	Morrison	J	Late	Kimmeridgian-Tithonian		McIntosh et al., 1996	GMNH PV 101 370
Camarasaurus	grandis			1.95082	NA	Morrison	J	Late	Kimmeridgian-Tithonian		McIntosh et al., 1996	GMNH PV 101 371
Camarasaurus	grandis			1.8875	NA	Morrison	J	Late	Kimmeridgian-Tithonian		McIntosh et al., 1996	GMNH PV 101 372
Camarasaurus	grandis			1.82569	NA	Morrison	J	Late	Kimmeridgian-Tithonian		McIntosh et al., 1996	GMNH PV 101 373
Camarasaurus	grandis			1.65	NA	Morrison	J	Late	Kimmeridgian-Tithonian		McIntosh et al., 1996	GMNH PV 101 358
Camarasaurus	grandis			1.61261	NA	Morrison	J	Late	Kimmeridgian-Tithonian		McIntosh et al., 1996	GMNH PV 101 382
Camarasaurus	grandis			1.68254	NA	Morrison	J	Late	Kimmeridgian-Tithonian		McIntosh et al., 1996	GMNH PV 101 385
Camarasaurus	grandis			1.57692	NA	Morrison	J	Late	Kimmeridgian-Tithonian		McIntosh et al., 1996	GMNH PV 101 386
Camarasaurus	grandis			2.05455	NA	Morrison	J	Late	Kimmeridgian-Tithonian		McIntosh et al., 1996	GMNH PV 101 390
Camarasaurus	grandis			1.63063	NA	Morrison	J	Late	Kimmeridgian-Tithonian		McIntosh et al., 1996	GMNH PV 101 389
Camarasaurus	grandis			2.12214	NA	Morrison	J	Late	Kimmeridgian-Tithonian		McIntosh et al., 1996	GMNH PV 101 388
Camarasaurus	grandis			2.03704	NA	Morrison	J	Late	Kimmeridgian-Tithonian		McIntosh et al., 1996	GMNH PV 101 394
Camarasaurus	grandis			2	NA	Morrison	J	Late	Kimmeridgian-Tithonian		McIntosh et al., 1996	GMNH PV 101 398
Camarasaurus	grandis			2.02857	NA	Morrison	J	Late	Kimmeridgian-Tithonian		McIntosh et al., 1996	GMNH PV 101 400
Camarasaurus	grandis			2.27473	NA	Morrison	J	Late	Kimmeridgian-Tithonian		McIntosh et al., 1996	GMNH PV 101 401
Camarasaurus	grandis			1.89076	NA	Morrison	J	Late	Kimmeridgian-Tithonian		McIntosh et al., 1996	GMNH PV 101 378
Camarasaurus	grandis			1.97581	NA	Morrison	J	Late	Kimmeridgian-Tithonian		McIntosh et al., 1996	GMNH PV 101 380
Camarasaurus	grandis			1.72222	NA	Morrison	J	Late	Kimmeridgian-Tithonian		McIntosh et al., 1996	GMNH PV 101 381
Camarasaurus	lentus			1.83478	NA	Morrison	J	Late	Kimmeridgian-Tithonian		White, 1958	AMNH 467
Camarasaurus	lentus			1.92174	NA	Morrison	J	Late	Kimmeridgian-Tithonian		White, 1958	AMNH 467
Camarasaurus	lentus			1.92135	NA	Morrison	J	Late	Kimmeridgian-Tithonian		White, 1958	AMNH 467
Camarasaurus	lentus			1.57609	NA	Morrison	J	Late	Kimmeridgian-Tithonian		White, 1958	AMNH 467
Camarasaurus	lentus			2.4717	NA	Morrison	J	Late	Kimmeridgian-Tithonian		Madsen et al., 1995	CM 11338
Camarasaurus	lentus			1.89231	NA	Morrison	J	Late	Kimmeridgian-Tithonian		Madsen et al., 1995	CM 11338
Camarasaurus	lentus			1.89855	NA	Morrison	J	Late	Kimmeridgian-Tithonian		Madsen et al., 1995	CM 11338
Camarasaurus	lentus			2.21154	NA	Morrison	J	Late	Kimmeridgian-Tithonian		Madsen et al., 1995	CM 11338
Camarasaurus	lentus			2.07937	NA	Morrison	J	Late	Kimmeridgian-Tithonian		Madsen et al., 1995	CM 11338
Camarasaurus	lentus			1.94231	NA	Morrison	J	Late	Kimmeridgian-Tithonian		Madsen et al., 1995	CM 11338
Camarasaurus	lentus			2.125	NA	Morrison	J	Late	Kimmeridgian-Tithonian		Madsen et al., 1995	CM 11338
Camarasaurus	lentus			2.14545	NA	Morrison	J	Late	Kimmeridgian-Tithonian		Madsen et al., 1995	CM 11338
Camarasaurus	lentus			1.91228	NA	Morrison	J	Late	Kimmeridgian-Tithonian		Madsen et al., 1995	CM 11338
Camarasaurus	lentus			2.13462	NA	Morrison	J	Late	Kimmeridgian-Tithonian		Madsen et al., 1995	CM 11338
Cardiodon	rugulosus			1.51752	EU	Forest Marble	J	Middle	Bathonian		Upchurch and Martin, 2003	OUMNH J13597
Cetiosauriscus	leedsi			1.16098	EU	Oxford Clay	J	Middle	Callovian		Barrett, 2006	BMNH R3377
Borealosaurus	wimani			3.58371	AS	Sunjian	K	Late	Cenomanian-Turonian		You et al., 2004	LPM0169
Chebsaurus	algeriensis			2	AF		J	Middle			Mahammad et al., 2005	D001-78
Chiayusaurus	lacustris			2.01357	AS	Xinminbao Gp.	K	Early	Barremian-Albian		Barrett et al. 2002
Coloradia	brevis			1.88	SA	Los Colorados	T	Late	Norian		Bonaparte, 1978	PVL 3967
Coloradia	brevis			1.57692	SA	Los Colorados	T	Late	Norian		Bonaparte, 1978	PVL 3967
Coloradia	brevis			1.44444	SA	Los Colorados	T	Late	Norian		Bonaparte, 1978	PVL 3967
Coloradia	brevis			1.19231	SA	Los Colorados	T	Late	Norian		Bonaparte, 1978	PVL 3967
Coloradia	brevis			1.30769	SA	Los Colorados	T	Late	Norian		Bonaparte, 1978	PVL 3967
Coloradia	brevis			1.44	SA	Los Colorados	T	Late	Norian		Bonaparte, 1978	PVL 3967
Coloradia	brevis			1.52174	SA	Los Colorados	T	Late	Norian		Bonaparte, 1978	PVL 3967
Coloradia	brevis			1.42857	SA	Los Colorados	T	Late	Norian		Bonaparte, 1978	PVL 3967
Coloradia	brevis			1.69565	SA	Los Colorados	T	Late	Norian		Bonaparte, 1978	PVL 3967
Coloradia	brevis			2.08333	SA	Los Colorados	T	Late	Norian		Bonaparte, 1978	PVL 3967
Coloradia	brevis			2.04762	SA	Los Colorados	T	Late	Norian		Bonaparte, 1978	PVL 3967
Coloradia	brevis			1.9	SA	Los Colorados	T	Late	Norian		Bonaparte, 1978	PVL 3967
Datousaurus	bashanensis			1.91379	AS	Shaximiao	J	Middle	Bajocian		Dong and Tang, 1984
Euhelopodidae	indet3			3.69663	AS	Khok Kruat	K	Early	Albian		Buffetaut et al., 2002
Euhelopodidae	indet1			1.74	AS	Phu Kradung	J	Late	Tithonian-Berriasian		Buffetaut et al., 2002
Euhelopodidae	indet1			1.67176	AS	Phu Kradung	J	Late	Tithonian-Berriasian		Buffetaut et al., 2002
Euhelopodidae	indet2			1.97479	AS	Phu Kum Kao	K	Early			Buffetaut et al., 2002
Euhelopodidae	indet2			1.81522	AS	Phu Kum Kao	K	Early			Buffetaut et al., 2002
Euhelopodidae?	indet 4			2.14815	EU	Margas y Calizas de Blesa	K	Early	Barremian	Early	Canudo et al., 2002	MPZ 97/464
Gongxianosaurus	shibeiensis			1.62983	AS	Ziliujing	J	Early	Pliensbachian		He et al, 1998
Gongxianosaurus	shibeiensis			1.26286	AS	Ziliujing	J	Early	Pliensbachian		He et al, 1998
Gyposaurus?	sinensis			2.18644	AS	Lower Lufeng	J	Early	Sinemurian		Young, 1948
Jobaria	tiguidensis			1.39535	AF		K	Early	Hauterivian-Barremian		Chure et al., 2010	MNN TIG uncat
Jobaria	tiguidensis			1.38462	AF		K	Early	Hauterivian-Barremian		Chure et al., 2010	MNN TIG uncat
Jobaria	tiguidensis			1	AF		K	Early	Hauterivian-Barremian		Chure et al., 2010	MNN TIG uncat
Jobaria	tiguidensis			1.66364	AF		K	Early	Hauterivian-Barremian		Chure et al., 2010	MNN TIG uncat
Kunmingosaurus	magnus			1.97561	AS	Lufeng	J	Early	Sinmurian-Pliensbachian		Young, 1966	PZGR 74?
Kunmingosaurus	magnus			1.85496	AS	Lufeng	J	Early	Sinmurian-Pliensbachian		Young, 1966	PZGR 74?
Kunmingosaurus	magnus			2.03101	AS	Lufeng	J	Early	Sinmurian-Pliensbachian		Young, 1966	PZGR 75?
Kunmingosaurus	magnus			1.9646	AS	Lufeng	J	Early	Sinmurian-Pliensbachian		Young, 1966	PZGR 75?
Lapparantosaurus				1.55789	MA		J	Middle	Bathonian		Chure et al., 2010	MAA173
Lapparantosaurus				1.6	MA		J	Middle	Bathonian		Chure et al., 2010	MAA198
Lufengosaurus	huenei			1.77778	AS	Lower Lufeng	J	Early	Hettangian		Barrett et al., 2005	IVPP V15
Lufengosaurus	huenei			1.57895	AS	Lower Lufeng	J	Early	Hettangian		Barrett et al., 2005	IVPP V15
Lufengosaurus	huenei			1.53659	AS	Lower Lufeng	J	Early	Hettangian		Barrett et al., 2005	IVPP V15
Lufengosaurus	huenei			1.18627	AS	Lower Lufeng	J	Early	Hettangian		Chure et al., 2010	FMNH CUP 2340a
Lufengosaurus	huenei			1.49286	AS	Lower Lufeng	J	Early	Hettangian		Chure et al., 2010	FMNH CUP 2340a
Lufengosaurus	magnus			1.83333	AS	Lower Lufeng	J	Early	Hettangian-Sinemurian		Dong, 1984
Lufengosaurus	magnus			2	AS	Lower Lufeng	J	Early	Hettangian-Sinemurian		Dong, 1984
Lufengosaurus	magnus			2	AS	Lower Lufeng	J	Early	Hettangian-Sinemurian		Dong, 1984
Lufengosaurus	magnus			1.92157	AS	Lower Lufeng	J	Early	Hettangian-Sinemurian		Dong, 1984
Lufengosaurus	magnus			1.71429	AS	Lower Lufeng	J	Early	Hettangian-Sinemurian		Dong, 1984
Macronaria	indet1			3.38298	AF		K				Kellner and Mader, 1997	LINHM 003
Mamenchisaurus	youngi			2.7377	AS	Shangshaximiao	J	Late	Oxfordian		Ouyang and Ye, 2002	ZDM0083
Mamenchisaurus	youngi			2.80328	AS	Shangshaximiao	J	Late	Oxfordian		Ouyang and Ye, 2002	ZDM0083
Mamenchisaurus	youngi			2.77586	AS	Shangshaximiao	J	Late	Oxfordian		Ouyang and Ye, 2002	ZDM0083
Mamenchisaurus	youngi			2.77586	AS	Shangshaximiao	J	Late	Oxfordian		Ouyang and Ye, 2002	ZDM0083
Mamenchisaurus	youngi			2.87037	AS	Shangshaximiao	J	Late	Oxfordian		Ouyang and Ye, 2002	ZDM0083
Mamenchisaurus	youngi			2.70909	AS	Shangshaximiao	J	Late	Oxfordian		Ouyang and Ye, 2002	ZDM0083
Mamenchisaurus	youngi			2.98246	AS	Shangshaximiao	J	Late	Oxfordian		Ouyang and Ye, 2002	ZDM0083
Mamenchisaurus	youngi			2.76364	AS	Shangshaximiao	J	Late	Oxfordian		Ouyang and Ye, 2002	ZDM0083
Mamenchisaurus	youngi			2.64706	AS	Shangshaximiao	J	Late	Oxfordian		Ouyang and Ye, 2002	ZDM0083
Mamenchisaurus	youngi			2.88889	AS	Shangshaximiao	J	Late	Oxfordian		Ouyang and Ye, 2002	ZDM0083
Mamenchisaurus	youngi			2.27778	AS	Shangshaximiao	J	Late	Oxfordian		Ouyang and Ye, 2002	ZDM0083
Mamenchisaurus	youngi			2.26531	AS	Shangshaximiao	J	Late	Oxfordian		Ouyang and Ye, 2002	ZDM0083
Mamenchisaurus	youngi			2.34043	AS	Shangshaximiao	J	Late	Oxfordian		Ouyang and Ye, 2002	ZDM0083
Mamenchisaurus	youngi			2.87778	AS	Shangshaximiao	J	Late	Oxfordian		Ouyang and Ye, 2002	ZDM0083
Mamenchisaurus	youngi			2.44048	AS	Shangshaximiao	J	Late	Oxfordian		Ouyang and Ye, 2002	ZDM0083
Mamenchisaurus	youngi			2.82895	AS	Shangshaximiao	J	Late	Oxfordian		Ouyang and Ye, 2002	ZDM0083
Mamenchisaurus	youngi			2.26027	AS	Shangshaximiao	J	Late	Oxfordian		Ouyang and Ye, 2002	ZDM0083
Mamenchisaurus	youngi			2.61728	AS	Shangshaximiao	J	Late	Oxfordian		Ouyang and Ye, 2002	ZDM0083
Mamenchisaurus	youngi			2.88889	AS	Shangshaximiao	J	Late	Oxfordian		Ouyang and Ye, 2002	ZDM0083
Mamenchisaurus	youngi			2.94505	AS	Shangshaximiao	J	Late	Oxfordian		Ouyang and Ye, 2002	ZDM0083
Mamenchisaurus	sinocanadorum			2.16	AS	Shishugou	J	Late	Oxfordian		Russell and Zheng, 1993	IVPP 87004
Mamenchisaurus	sinocanadorum			2.35714	AS	Shishugou	J	Late	Oxfordian		Russell and Zheng, 1993	IVPP 87004
Mamenchisaurus	sinocanadorum			2.38095	AS	Shishugou	J	Late	Oxfordian		Russell and Zheng, 1993	IVPP 87004
Mamenchisaurus	sinocanadorum			2.14286	AS	Shishugou	J	Late	Oxfordian		Russell and Zheng, 1993	IVPP 87004
Mamenchisaurus	sinocanadorum			2.02381	AS	Shishugou	J	Late	Oxfordian		Russell and Zheng, 1993	IVPP 87004
Mamenchisaurus	sinocanadorum			1.97619	AS	Shishugou	J	Late	Oxfordian		Russell and Zheng, 1993	IVPP 87004
Mamenchisaurus	sinocanadorum			2	AS	Shishugou	J	Late	Oxfordian		Russell and Zheng, 1993	IVPP 87004
Mamenchisaurus	sinocanadorum			2.02564	AS	Shishugou	J	Late	Oxfordian		Russell and Zheng, 1993	IVPP 87004
Mamenchisaurus	sinocanadorum			1.53846	AS	Shishugou	J	Late	Oxfordian		Russell and Zheng, 1993	IVPP 87004
Mamenchisaurus	sinocanadorum			1.43333	AS	Shishugou	J	Late	Oxfordian		Russell and Zheng, 1993	IVPP 87004
Mamenchisaurus	sinocanadorum			1.26471	AS	Shishugou	J	Late	Oxfordian		Russell and Zheng, 1993	IVPP 87004
Massospondylus				1.68508	NA	Kayenta	J	Early	Sinemurian-Pleinsbachian		Attridge et al, 1985
Massospondylus				1.45307	AF	Upper Elliot	J	Early	Hettangian-Sinemurian		Barrett 2004	SAM-PK-K1325
Massospondylus	carinatus			1.67347	AF		J	Early	Hettangian-Sinemurian		Cooper, 1981	NMR7951
Massospondylus	carinatus			1.55769	AF		J	Early	Hettangian-Sinemurian		Cooper, 1981	NMR7951
Massospondylus	carinatus			2.16	AF		J	Early	Hettangian-Sinemurian		Cooper, 1981	QG43
Massospondylus	carinatus			2.9434	AF		J	Early	Hettangian-Sinemurian		Gow et al., 1990	BP/1/5247
Massospondylus	carinatus			3.22	AF		J	Early	Hettangian-Sinemurian		Gow et al., 1990	BP/1/5247
Massospondylus	carinatus			1.92	AF		J	Early	Hettangian-Sinemurian		Gow et al., 1990	BP/1/5247
Massospondylus	carinatus			1.92	AF		J	Early	Hettangian-Sinemurian		Gow et al., 1990	BP/1/5247
Massospondylus	carinatus			1.98039	AF		J	Early	Hettangian-Sinemurian		Gow et al., 1990	BP/1/5247
Massospondylus	carinatus			1.76471	AF		J	Early	Hettangian-Sinemurian		Gow et al., 1990	BP/1/5247
Massospondylus	carinatus			1.86047	AF		J	Early	Hettangian-Sinemurian		Gow et al., 1990	BP/1/5247
Massospondylus	carinatus			1.86047	AF		J	Early	Hettangian-Sinemurian		Gow et al., 1990	BP/1/5247
Massospondylus	carinatus			1.76923	AF		J	Early	Hettangian-Sinemurian		Gow et al., 1990	BP/1/5247
Massospondylus	carinatus			1.51282	AF		J	Early	Hettangian-Sinemurian		Gow et al., 1990	BP/1/5247
Massospondylus	carinatus			1.51282	AF		J	Early	Hettangian-Sinemurian		Gow et al., 1990	BP/1/5247
Massospondylus	carinatus			3.07692	AF	Middle Elliot	J	Early	Hettangian-Sinemurian		Gow et al., 1990	BP/1/4376
Massospondylus	carinatus			2.84615	AF	Middle Elliot	J	Early	Hettangian-Sinemurian		Gow et al., 1990	BP/1/4376
Massospondylus	carinatus			2.41935	AF	Middle Elliot	J	Early	Hettangian-Sinemurian		Gow et al., 1990	BP/1/4376
Massospondylus	carinatus			2.41935	AF	Middle Elliot	J	Early	Hettangian-Sinemurian		Gow et al., 1990	BP/1/4376
Massospondylus	carinatus			2.22857	AF	Middle Elliot	J	Early	Hettangian-Sinemurian		Gow et al., 1990	BP/1/4376
Massospondylus	carinatus			2.03125	AF	Middle Elliot	J	Early	Hettangian-Sinemurian		Gow et al., 1990	BP/1/4376
Massospondylus	carinatus			1.72727	AF	Middle Elliot	J	Early	Hettangian-Sinemurian		Gow et al., 1990	BP/1/4376
Massospondylus	carinatus			1.75758	AF	Middle Elliot	J	Early	Hettangian-Sinemurian		Gow et al., 1990	BP/1/4376
Massospondylus	carinatus			2.16667	AF	Middle Elliot	J	Early	Hettangian-Sinemurian		Gow et al., 1990	BP/1/5247
Massospondylus	carinatus			2.31818	AF	Middle Elliot	J	Early	Hettangian-Sinemurian		Gow et al., 1990	BP/1/5247
Massospondylus	carinatus			1.77273	AF	Middle Elliot	J	Early	Hettangian-Sinemurian		Gow et al., 1990	BP/1/5247
Massospondylus	carinatus			1.77273	AF	Middle Elliot	J	Early	Hettangian-Sinemurian		Gow et al., 1990	BP/1/5247
Massospondylus	carinatus			1.98864	AF	Middle Elliot	J	Early	Hettangian-Sinemurian		Sues et al., 2004	BP/1/4779
Massospondylus	carinatus			2.42857	AF	Middle Elliot	J	Early	Hettangian-Sinemurian		Sues et al., 2004	BP/1/4779
Massospondylus	carinatus			1.51	AF	Middle Elliot	J	Early	Hettangian-Sinemurian		Sues et al., 2004	BP/1/5241
Massospondylus	carinatus			2.00909	AF	Middle Elliot	J	Early	Hettangian-Sinemurian		Sues et al., 2004	BP/1/5241
Massospondylus	carinatus			3.29358	AF	Middle Elliot	J	Early	Hettangian-Sinemurian		Sues et al., 2004	BP/1/5241
Massospondylus	carinatus			1.90323	AF	Middle Elliot	J	Early	Hettangian-Sinemurian		Sues et al., 2004	BP/1/4934
Massospondylus	carinatus			2.24771	AF	Middle Elliot	J	Early	Hettangian-Sinemurian		Sues et al., 2004	BP/1/4934
Massospondylus	carinatus			3.00909	AF	Middle Elliot	J	Early	Hettangian-Sinemurian		Sues et al., 2004	BP/1/4934
Melanorosaurus	readi			2.11538	AF	Lower Elliot	T	Late	Norian		Yates, 2007	NM QR3314
Melanorosaurus	readi			1.8046	AF	Lower Elliot	T	Late	Norian		Yates, 2007	NM QR3314
Melanorosaurus	readi			1.61039	AF	Lower Elliot	T	Late	Norian		Yates, 2007	NM QR3314
Mussaurus	patagonicus			2.0339	SA	El Tranquilo	T	Late	Norian		Chure et al., 2010	MRG 17-4
Mussaurus	patagonicus			1.46377	SA	El Tranquilo	T	Late	Norian		Chure et al., 2010	MRG 17-4
Mussaurus				1.51667	SA	El Tranquilo	T	Late	Norian		Casamiquela, 1980	68-II-28-1
Mussaurus	patagonicus			1.72199	SA	El Tranquilo	T	Late			Pol and Powell, 2007	MPM-PV 1813/2
Neosauropoda	indet			4.44444	IN	Lameta	K	Late	Maastrichtian		Wilson and Upchurch, 2003	GSI 20,006
Omeisaurus	tianfuensis			1.4404	AS	Lower Shaximiao	J	Late	Bathonian-Callovian		He et al., 1984	T5705
Omeisaurus	tianfuensis			1.83908	AS	Lower Shaximiao	J	Late	Bathonian-Callovian		He et al., 1984	T5705
Omeisaurus	tianfuensis			1.33918	AS	Lower Shaximiao	J	Late	Bathonian-Callovian		He et al., 1984	T5705
Omeisaurus	tianfuensis			2.77778	AS	Lower Shaximiao	J	Late	Bathonian-Callovian		He et al., 1984	T5703
Omeisaurus	tianfuensis			2.94118	AS	Lower Shaximiao	J	Late	Bathonian-Callovian		He et al., 1984	T5703
Omeisaurus	tianfuensis			2.92063	AS	Lower Shaximiao	J	Late	Bathonian-Callovian		He et al., 1984	T5703
Omeisaurus	tianfuensis			2.30159	AS	Lower Shaximiao	J	Late	Bathonian-Callovian		He et al., 1984	T5703
Omeisaurus	tianfuensis			2.29508	AS	Lower Shaximiao	J	Late	Bathonian-Callovian		He et al., 1984	T5703
Omeisaurus	tianfuensis			2.56863	AS	Lower Shaximiao	J	Late	Bathonian-Callovian		He et al., 1984	T5703
Omeisaurus	tianfuensis			1.78689	AS	Lower Shaximiao	J	Late	Bathonian-Callovian		He et al., 1984	T5703
Omeisaurus	tianfuensis			1.79592	AS	Lower Shaximiao	J	Late	Bathonian-Callovian		He et al., 1984	T5703
Omeisaurus	tianfuensis			1.83333	AS	Lower Shaximiao	J	Late	Bathonian-Callovian		He et al., 1984	T5703
Omeisaurus	tianfuensis			1.73171	AS	Lower Shaximiao	J	Late	Bathonian-Callovian		He et al., 1984	T5703
Omeisaurus	tianfuensis			1.62	AS	Lower Shaximiao	J	Late	Bathonian-Callovian		He et al., 1984	T5703
Omeisaurus	tianfuensis			2.12069	AS	Lower Shaximiao	J	Late	Bathonian-Callovian		He et al., 1984	T5703
Omeisaurus	maoianus			2.85714	AS	Lower Shaximiao	J	Late	Bathonian-Callovian		Tang et al., 2001
Omeisaurus	maoianus			2.42373	AS	Lower Shaximiao	J	Late	Bathonian-Callovian		Tang et al., 2001
Omeisaurus	maoianus			2.95082	AS	Lower Shaximiao	J	Late	Bathonian-Callovian		Tang et al., 2001
Omeisaurus	maoianus			2.7377	AS	Lower Shaximiao	J	Late	Bathonian-Callovian		Tang et al., 2001
Omeisaurus	maoianus			2.70492	AS	Lower Shaximiao	J	Late	Bathonian-Callovian		Tang et al., 2001
Omeisaurus	maoianus			3	AS	Lower Shaximiao	J	Late	Bathonian-Callovian		Tang et al., 2001
Omeisaurus	maoianus			1.72131	AS	Lower Shaximiao	J	Late	Bathonian-Callovian		Tang et al., 2001
Omeisaurus	maoianus			1.80328	AS	Lower Shaximiao	J	Late	Bathonian-Callovian		Tang et al., 2001
Omeisaurus	maoianus			2.08333	AS	Lower Shaximiao	J	Late	Bathonian-Callovian		Tang et al., 2001
Omeisaurus	maoianus			1.94915	AS	Lower Shaximiao	J	Late	Bathonian-Callovian		Tang et al., 2001
Omeisaurus	maoianus			2.31667	AS	Lower Shaximiao	J	Late	Bathonian-Callovian		Tang et al., 2001
Ornithopsis	hulkei			1.76471	EU	Wessex	K	Early	Barremian		Lydekker, 1888	BMNH R.964
Pantydraco	caducus			2.03448	EU		T-J	L-E	Carnian-Hettangian		Yates, 2003	BMNH P24
Pantydraco	caducus			1.79412	EU		T-J	L-E	Carnian-Hettangian		Yates, 2003	BMNH P24
Pantydraco	caducus			2.08571	EU		T-J	L-E	Carnian-Hettangian		Yates, 2003	BMNH P24
Pantydraco	caducus			1.89474	EU		T-J	L-E	Carnian-Hettangian		Yates, 2003	BMNH P24
Pantydraco	caducus			1.97561	EU		T-J	L-E	Carnian-Hettangian		Yates, 2003	BMNH P24
Pantydraco	caducus			1.64103	EU		T-J	L-E	Carnian-Hettangian		Yates, 2003	BMNH P24
Pantydraco	caducus			1.91176	EU		T-J	L-E	Carnian-Hettangian		Yates, 2003	BMNH P24
Pantydraco	caducus			1.28571	EU		T-J	L-E	Carnian-Hettangian		Yates, 2003	BMNH P24
Pantydraco	caducus			2.17857	EU		T-J	L-E	Carnian-Hettangian		Yates, 2003	BMNH P24
Pantydraco?	sp			1.49474	EU	Pant-y-ffon Quarry	T-J	L-E	Carnian-Hettangian		Kermack, 1984	P65/42
Patagosaurus	fariasi			1.48447	SA	Cañadon Asfalto	J	Middle	Callovian		Bonaparte, 1986	MACN-CH 933?
Patagosaurus	fariasi			1.55357	SA	Cañadon Asfalto	J	Middle	Callovian		Bonaparte, 1986	MACN-CH 933?
Patagosaurus	fariasi			1.36905	SA	Cañadon Asfalto	J	Middle	Callovian		Bonaparte, 1986	MACN-CH 933?
Plateosaurus	englehardti			1.94444	EU	Knollenmergel	T	Late	Carnian		Chure et al., 2010	AMNH 6810 (cast)
Plateosaurus	englehardti			1.8875	EU	Knollenmergel	T	Late	Carnian		Chure et al., 2010	AMNH 6810 (cast)
Plateosaurus	englehardti			1.74286	EU	Knollenmergel	T	Late	Carnian		Chure et al., 2010	AMNH 6810 (cast)
Plateosaurus	englehardti			1.66667	EU	Knollenmergel	T	Late	Carnian		Chure et al., 2010	AMNH 6810 (cast)
Plateosaurus	englehardti			2.01449	EU	Knollenmergel	T	Late	Carnian		Chure et al., 2010	AMNH 6810 (cast)
Plateosaurus	englehardti			1.36842	EU	Knollenmergel	T	Late	Carnian		Chure et al., 2010	AMNH 6810 (cast)
Plateosaurus	englehardti			1.56338	EU	Knollenmergel	T	Late	Carnian		Chure et al., 2010	AMNH 6810 (cast)
Plateosaurus	englehardti			1.31579	EU	Knollenmergel	T	Late	Carnian		Chure et al., 2010	AMNH 6810 (cast)
Plateosaurus	englehardti			1.38667	EU	Knollenmergel	T	Late	Carnian		Chure et al., 2010	AMNH 6810 (cast)
Plateosaurus	englehardti			1.51351	EU	Knollenmergel	T	Late	Carnian		Chure et al., 2010	AMNH 6810 (cast)
Plateosaurus	englehardti			1.37838	EU	Knollenmergel	T	Late	Carnian		Chure et al., 2010	AMNH 6810 (cast)
Plateosaurus	englehardti			1.56716	EU	Knollenmergel	T	Late	Carnian		Chure et al., 2010	AMNH 6810 (cast)
Plateosaurus	englehardti			1.79545	EU	Knollenmergel	T	Late	Carnian		Chure et al., 2010	AMNH 6810 (cast)
Plateosaurus	englehardti			2.03797	EU	Knollenmergel	T	Late	Carnian		Chure et al., 2010	AMNH 6810 (cast)
Plateosaurus	englehardti			1.85714	EU	Knollenmergel	T	Late	Carnian		Chure et al., 2010	AMNH 6810 (cast)
Plateosaurus	englehardti			1.74286	EU	Knollenmergel	T	Late	Carnian		Chure et al., 2010	AMNH 6810 (cast)
Plateosaurus	englehardti			1.71429	EU	Knollenmergel	T	Late	Carnian		Chure et al., 2010	AMNH 6810 (cast)
Plateosaurus	englehardti			1.40506	EU	Knollenmergel	T	Late	Carnian		Chure et al., 2010	AMNH 6810 (cast)
Plateosaurus	englehardti			1.52459	EU	Knollenmergel	T	Late	Carnian		Chure et al., 2010	AMNH 6810 (cast)
Plateosaurus	englehardti			1.81538	EU	Knollenmergel	T	Late	Carnian		Chure et al., 2010	AMNH 6810 (cast)
Plateosaurus	englehardti			2.22807	EU	Knollenmergel	T	Late	Carnian		Chure et al., 2010	AMNH 6810 (cast)
Plateosaurus	englehardti			1.89706	EU	Knollenmergel	T	Late	Carnian		Chure et al., 2010	AMNH 6810 (cast)
Plateosaurus	englehardti			1.83099	EU	Knollenmergel	T	Late	Carnian		Chure et al., 2010	AMNH 6810 (cast)
Plateosaurus	englehardti			1.76056	EU	Knollenmergel	T	Late	Carnian		Chure et al., 2010	AMNH 6810 (cast)
Plateosaurus	englehardti			1.5625	EU	Knollenmergel	T	Late	Carnian		Chure et al., 2010	AMNH 6810 (cast)
Plateosaurus	englehardti			1.625	EU	Knollenmergel	T	Late	Carnian		Chure et al., 2010	AMNH 6810 (cast)
Plateosaurus	englehardti			1.79452	EU	Knollenmergel	T	Late	Carnian		Chure et al., 2010	AMNH 6810 (cast)
Plateosaurus	englehardti			1.78571	EU	Knollenmergel	T	Late	Carnian		Chure et al., 2010	AMNH 6810 (cast)
Plateosaurus	englehardti			2.01449	EU	Knollenmergel	T	Late	Carnian		Chure et al., 2010	AMNH 6810 (cast)
Plateosaurus	englehardti			1.71333	EU	Knollenmergel	T	Late	Carnian		Galton, 1986	MSF 1
Plateosaurus	englehardti			1.78571	EU	Knollenmergel	T	Late	Carnian		Galton, 1986	MSF 1
Plateosaurus	englehardti			1.98649	EU	Knollenmergel	T	Late	Carnian		Galton, 1986	MSF 1
Plateosaurus	englehardti			1.68712	EU	Stubensandstein	T	Late	Norian		Galton, 1985	MSF2
Plateosaurus	englehardti			1.63522	EU	Stubensandstein	T	Late	Norian		Galton, 1985	MSF2
Plateosaurus	englehardti			1.7	EU	Stubensandstein	T	Late	Norian		Galton, 1985	MSF2
Plateosaurus	englehardti			1.75	EU	Stubensandstein	T	Late	Norian		Galton, 1985	MSF2
Plateosaurus	englehardti			1.62983	EU	Stubensandstein	T	Late	Norian		Galton, 1985	MSF2
Plateosaurus	englehardti			1.84	EU						Moser, 2003	BSP 1962 XLVI 3, PQ 7 K
Plateosaurus	englehardti			2.05882	EU						Moser, 2003	BSP 1962 XLVI 6, PQ 32
Plateosaurus	engelhardti			1.40625	EU	Knollenmergel	T	Late	Norian		Galton, 1984	SMNS 13200
Plateosaurus	engelhardti			1.47541	EU	Knollenmergel	T	Late	Norian		Galton, 1984	SMNS 13200
Plateosaurus	engelhardti			1.40984	EU	Knollenmergel	T	Late	Norian		Galton, 1984	SMNS 13200
Plateosaurus	engelhardti			1.36667	EU	Knollenmergel	T	Late	Norian		Galton, 1984	SMNS 13200
Plateosaurus	engelhardti			1.48276	EU	Knollenmergel	T	Late	Norian		Galton, 1984	SMNS 13200
Plateosaurus	engelhardti			1.6	EU	Knollenmergel	T	Late	Norian		Galton, 1984	SMNS 13200
Plateosaurus	engelhardti			1.55556	EU	Knollenmergel	T	Late	Norian		Galton, 1984	SMNS 13200
Plateosaurus	engelhardti			1.44444	EU	Knollenmergel	T	Late	Norian		Galton, 1984	SMNS 13200
Plateosaurus	engelhardti			1.35556	EU	Knollenmergel	T	Late	Norian		Galton, 1984	SMNS 13200
Plateosaurus	engelhardti			1.28889	EU	Knollenmergel	T	Late	Norian		Galton, 1984	SMNS 13200
Plateosaurus	engelhardti			1.44186	EU	Knollenmergel	T	Late	Norian		Galton, 1984	SMNS 13200
Plateosaurus	engelhardti			1.40909	EU	Knollenmergel	T	Late	Norian		Galton, 1984	SMNS 13200
Plateosaurus	engelhardti			1.4878	EU	Knollenmergel	T	Late	Norian		Galton, 1984	SMNS 13200
Plateosaurus	engelhardti			1.6129	EU	Knollenmergel	T	Late	Norian		Galton, 1984	SMNS 13200
Plateosaurus	engelhardti			1.6129	EU	Knollenmergel	T	Late	Norian		Galton, 1984	SMNS 13200
Plateosaurus	engelhardti			1.78571	EU	Knollenmergel	T	Late	Norian		Galton, 1984	SMNS 13200
Plateosaurus	engelhardti			1.6	EU	Knollenmergel	T	Late	Norian		Galton, 1984	SMNS 13200
Plateosaurus	engelhardti			1.46667	EU	Knollenmergel	T	Late	Norian		Galton, 1984	SMNS 13200
Plateosaurus	engelhardti			1.46667	EU	Knollenmergel	T	Late	Norian		Galton, 1984	SMNS 13200
Plateosaurus	engelhardti			1.4	EU	Knollenmergel	T	Late	Norian		Galton, 1984	SMNS 13200
Plateosaurus	engelhardti			1.36667	EU	Knollenmergel	T	Late	Norian		Galton, 1984	SMNS 13200
Plateosaurus	engelhardti			2	EU	Knollenmergel	T	Late	Norian		Galton, 1998	NMNH 1887
Plateosaurus	engelhardti			2.0625	EU	Knollenmergel	T	Late	Norian		Galton, 1998	NMNH 1887
Plateosaurus	engelhardti			1.93103	EU	Knollenmergel	T	Late	Norian		Galton, 1998	NMNH 1887
Plateosaurus	engelhardti			1.86667	EU	Knollenmergel	T	Late	Norian		Galton, 1998	NMNH 1887
Plateosaurus	engelhardti			2.22222	EU	Knollenmergel	T	Late	Norian		Galton, 1998	NMNH 1887
Plateosaurus	engelhardti			2.2	EU	Knollenmergel	T	Late	Norian		Galton, 1998	NMNH 1887
Plateosaurus	engelhardti			2.08163	EU	Knollenmergel	T	Late	Norian		Galton, 1998	Fig 10
Plateosaurus	engelhardti			2.06422	EU	Knollenmergel	T	Late	Norian		Galton, 1998	Fig 10
Plateosaurus	engelhardti			1.35714	EU	Knollenmergel	T	Late	Norian		Galton, 1998	Fig 9
Plateosaurus	engelhardti			1.29609	EU	Knollenmergel	T	Late	Norian		Galton, 1998	Fig 9
Plateosaurus	engelhardti			1.29609	EU	Knollenmergel	T	Late	Norian		Galton, 1998	Fig 9
Plateosaurus				1.51309	EU	Knollenmergel	T	Late	Norian		Sander, 1992	MSF 34
Pleurocoelus?	valdensis			1.01835	EU	Wessex	K	Early	Barremian		Lydekker, 1890
Prosauropoda	indet			2	MA	Lower Isalo II	T	Late	Carnian?		Flynn et al, 1999	UA-10603
Prosauropoda	indet			2.02041	MA	Lower Isalo II	T	Late	Carnian?		Flynn et al, 1999	UA-10603
Prosauropoda	indet			2	MA	Lower Isalo II	T	Late	Carnian?		Flynn et al, 1999	UA-10603
Prosauropoda	indet			2.30769	MA	Lower Isalo II	T	Late	Carnian?		Flynn et al, 1999	UA-10603
Prosauropoda	indet			2.43333	MA	Lower Isalo II	T	Late	Carnian?		Flynn et al, 1999	UA-10603
Prosauropoda	indet			1.98485	MA	Lower Isalo II	T	Late	Carnian?		Flynn et al, 1999	UA-10603
Prosauropoda	indet			1.81818	MA	Lower Isalo II	T	Late	Carnian?		Flynn et al, 1999	UA-10603
Prosauropoda	indet			2.31884	MA	Lower Isalo II	T	Late	Carnian?		Flynn et al, 1999	UA-10603
Prosauropoda	indet			2.40845	MA	Lower Isalo II	T	Late	Carnian?		Flynn et al, 1999	UA-10603
Prosauropoda	indet			2.44615	MA	Lower Isalo II	T	Late	Carnian?		Flynn et al, 1999	UA-10603
Prosauropoda	indet2			1.23226	AF						Chure et al., 2010	MNHN ACM-509
Saturnalia	tupiniquim			1.59551	SA	Santa Maria	T	Middle-Late	Ladinian-Carnian		Chure et al., 2010	MCP 3845-PV
Saturnalia	tupiniquim			1.51532	SA	Santa Maria	T	Middle-Late	Ladinian-Carnian		Chure et al., 2010	MCP 3845-PV
Saturnalia	tupiniquim			1.56923	SA	Santa Maria	T	Middle-Late	Ladinian-Carnian		Chure et al., 2010	MCP 3845-PV
Sellosaurus	gracilis			1.47727	EU	Stubensandstein	T	Late	Norian		Galton, 1985	GPIT 18318a
Sellosaurus	gracilis			1.35556	EU	Stubensandstein	T	Late	Norian		Galton, 1985	GPIT 18318a
Sellosaurus	gracilis			1.8	EU	Stubensandstein	T	Late	Norian		Galton, 1985	GPIT 18318a
Sellosaurus	gracilis			1.83333	EU	Stubensandstein	T	Late	Norian		Galton, 1985	GPIT 18318a
Sellosaurus	gracilis			2.29412	EU	Stubensandstein	T	Late	Norian		Galton, 1985	GPIT 18318a
Sellosaurus	gracilis			1.92857	EU	Stubensandstein	T	Late	Norian		Galton, 1985	SMNS12684
Sellosaurus	gracilis			2.10526	EU	Stubensandstein	T	Late	Norian		Galton, 1985	SMNS12684
Sellosaurus	gracilis			2.36842	EU	Stubensandstein	T	Late	Norian		Galton, 1985	SMNS12684
Sellosaurus	gracilis			2.04651	EU	Stubensandstein	T	Late	Norian		Galton, 1985	SMNS12684
Sellosaurus	gracilis			2.26667	EU	Stubensandstein	T	Late	Norian		Galton, 1985	SMNS12684
Sellosaurus	gracilis			2.04878	EU	Stubensandstein	T	Late	Norian		Galton, 1985	SMNS12684
Sellosaurus	gracilis			2.02564	EU	Stubensandstein	T	Late	Norian		Galton, 1985	SMNS12684
Sellosaurus	gracilis			1.95	EU	Stubensandstein	T	Late	Norian		Galton, 1985	SMNS12684
Sellosaurus	gracilis			1.8	EU	Stubensandstein	T	Late	Norian		Galton, 1985	SMNS12684
Sellosaurus	gracilis			1.87755	EU	Stubensandstein	T	Late	Norian		Galton, 1985	SMNS12684
Sellosaurus	gracilis			2	EU	Stubensandstein	T	Late	Norian		Galton, 1985	SMNS12684
Sellosaurus	gracilis			1.74468	EU	Stubensandstein	T	Late	Norian		Galton, 1985	SMNS12684
Sellosaurus	gracilis			1.76596	EU	Stubensandstein	T	Late	Norian		Galton, 1985	SMNS12684
Sellosaurus	gracilis			1.91111	EU	Stubensandstein	T	Late	Norian		Galton, 1985	SMNS12684
Sellosaurus	gracilis			1.55102	EU	Stubensandstein	T	Late	Norian		Galton, 1985	SMNS12684
Shunosaurus	lii			2.82143	AS	Shaximiao	J	Middle	Bajocian		Zhang, 1988	T5402
Shunosaurus	lii			1.87143	AS	Shaximiao	J	Middle	Bajocian		Zhang, 1988	T5402
Shunosaurus	lii			2.05085	AS	Shaximiao	J	Middle	Bajocian		Zhang, 1988	T5402
Shunosaurus	lii			2.85714	AS	Shaximiao	J	Middle	Bajocian		Zhang, 1988	T5402
Shunosaurus	lii			2.10811	AS	Shaximiao	J	Middle	Bajocian		Zhang, 1988	T5402
Shunosaurus	lii			2.17949	AS	Shaximiao	J	Middle	Bajocian		Zhang, 1988	T5402
Tazoudasaurus	naimi			1.34821	AF		J	Early	Toarcian		Allain et al., 2004	TO 2000-1
Tazoudasaurus	naimi			1.35802	AF		J	Early	Toarcian		Allain et al., 2004	TO 2000-1
Tazoudasaurus	naimi			1.6	AF		J	Early	Toarcian		Allain et al., 2004	TO 2000-1
Tazoudasaurus	naimi			1.81818	AF		J	Early	Toarcian		Allain et al., 2004	TO 2000-1
Tazoudasaurus	naimi			1.81818	AF		J	Early	Toarcian		Allain et al., 2004	TO 2000-1
Tazoudasaurus	naimi			1.65	AF		J	Early	Toarcian		Allain et al., 2004	TO 2000-1
Tazoudasaurus	naimi			1.7	AF		J	Early	Toarcian		Allain et al., 2004	TO 2000-1
Texas Pleurocoelus				3.25688	NA	Paluxy	K	Early	Aptian		Langston, 1974	USNM 187535
Thecodontosaurus	antiquus			2.21429	EU	Magnesian Conglom	T	Late	Norian-Rhaetian		Benton et al., 2000	BRSMG C4529
Thecodontosaurus	antiquus			2.21429	EU	Magnesian Conglom	T	Late	Norian-Rhaetian		Benton et al., 2000	BRSMG C4529
Thecodontosaurus	antiquus			1.925	EU	Magnesian Conglom	T	Late	Norian-Rhaetian		Benton et al., 2000	BRSMG C4529
Thecodontosaurus	antiquus			2.08791	EU	Magnesian Conglom	T	Late	Norian-Rhaetian		Benton et al., 2000	BRSMG C4529
Titanosauriformes	indet6			2.97101	SA	La Amarga	K	Early	Barremian		Apestiguia, 2007	MACNPV N97
Titanosauriformes	indet6			4.63218	SA	La Amarga	K	Early	Barremian		Apestiguia, 2007	MACNPV N102
Titanosauriformes	indet3			1.99048	AS	Kuwajima	K	Early	Barriasian-Hauterivian		Barrett et al., 2002	SBEI 183
Titanosauriformes	indet3			2.47879	AS	Kuwajima	K	Early	Barriasian-Hauterivian		Barrett et al., 2002	SBEI 13
Titanosauriformes	indet3			2.48804	AS	Kuwajima	K	Early	Barriasian-Hauterivian		Barrett et al., 2002	SBEI 160
Titanosauriformes	indet3			1.912	AS	Kuwajima	K	Early	Barriasian-Hauterivian		Barrett et al., 2002	SBEI 583
Titanosauriformes	indet2			3.26316	SA	Adamantina o Marília	K	Late	Campanian-Maastrichtian		Santucci and Bertini, 2001	IG 220-V
Titanosauriformes	indet2			3.20513	SA	Adamantina o Marília	K	Late	Campanian-Maastrichtian		Santucci and Bertini, 2001	H-URC
Titanosauriformes	indet4			3.17722	EU	Auzas Marls	K	Late	Maastrichtian		Laurent et al., 2002
Titanosauriformes	indet5			4.64835	SA	Bauru Gp	L	Late	Maastrichtian		Kellner, 1996
Titanosauriformes	indet5			4.33333	SA	Bauru Gp	L	Late	Maastrichtian		Kellner, 1996
Turiasaurus	riodevensis			1.12222	EU	Villar del Arzobispo	J	Late	Tithonian-Berriasian		Royo-Torres et al., 2006	CPT-1213
Turiasaurus	riodevensis			1.30693	EU	Villar del Arzobispo	J	Late	Tithonian-Berriasian		Royo-Torres et al., 2006	CPT-1215
Turiasaurus	riodevensis			1.30693	EU	Villar del Arzobispo	J	Late	Tithonian-Berriasian		Royo-Torres et al., 2006	CPT-1217
Unayasaurus	tolentinoi			1.85714	SA	Caturrita	T	Late	Carnian-Norian		Leal et al 2004	UFSM11069
Yimenosaurus	youngi			2.775	AS	Fengjiahe	J	Early			Bai et al., 1990	YXV8701
Yimenosaurus	youngi			2.46939	AS	Fengjiahe	J	Early			Bai et al., 1990	YXV8701
Yimenosaurus	youngi			2.03279	AS	Fengjiahe	J	Early			Bai et al., 1990	YXV8701
Yunnanosaurus	huangi			2.33913	AS	Lower Lufeng	J	Early	Sinemurian		Barrett et al., 2007	NGMJ 004546
Yunnanosaurus	huangi			2.2	AS	Lower Lufeng	J	Early	Sinemurian		Barrett et al., 2007	NGMJ 004546
Yunnanosaurus	huangi			1.61905	AS	Lower Lufeng	J	Early	Sinemurian		Barrett et al., 2007	NGMJ 004546
Yunnanosaurus	huangi			1.43243	AS	Lower Lufeng	J	Early	Sinemurian		Barrett et al., 2007	NGMJ 004546
Yunnanosaurus	huangi			1.85185	AS	Lower Lufeng	J	Early	Sinemurian		Barrett et al., 2007	NGMJ 004546
Yunnanosaurus	huangi			1.53636	AS	Lower Lufeng	J	Early	Sinemurian		Barrett et al., 2007	NGMJ 004546
Yunnanosaurus	huangi			1.89394	AS	Lower Lufeng	J	Early	Sinemurian		Galton, 1985	FMNH CUP 2056
Yunnanosaurus	huangi			2.32824	AS	Lower Lufeng	J	Early	Sinemurian		Galton, 1985	FMNH CUP 2051
Yunnanosaurus	huangi			2.38636	AS	Lower Lufeng	J	Early	Sinemurian		Galton, 1985	FMNH CUP 2047-a
Zizhongosaurus				2.05077	AS	Lufeng	J	Early	Sinemurian-Pleinsbachian		Barrett, 1999	FMNH CUP 2042
Mongolosaurus	haplodon	?		3.575	AS	On Gong	K	Early			Gilmore, 1933	AMNH 6710 (4)
Mongolosaurus	haplodon	?		3.57143	AS	On Gong	K	Early			Gilmore, 1933	AMNH 6710 (5)
			avg	2.32404
			min	1
			max	6.45098
			sd	0.982281
